# Supplementary material for: Long-term Impact of Prior Secondhand Tobacco Smoke Exposure on Respiratory Health
Source: bioRxiv or medRxiv preprint supplement (doi:10.1101/2021.09.17.21263750), 2021-09-22
Supplement: Supplementary file [file media-1.zip]

## **Long-term Impact of Prior Secondhand Tobacco Smoke Exposure on Respiratory Health**

Fernando Diaz del Valle, MD<sup>1</sup>, Jonathan K. Zakrajsek, MS<sup>1</sup>, Sung-Joon Min, PhD<sup>2</sup>, Patricia B. Koff, RRT, MEd<sup>1</sup>, Harold W. Bell, BS<sup>1</sup>, Keegan A. Kincaid, BS<sup>1</sup>, Daniel N. Frank, PhD<sup>3</sup>, Vijay Ramakrishnan, MD<sup>4</sup>, Moumita Ghosh, PhD<sup>1</sup> and R. William Vandivier, MD<sup>1</sup>.

<sup>1</sup>Division of Pulmonary Sciences and Critical Care Medicine, Colorado Pulmonary Outcomes Research Group (CPOR), <sup>2</sup>Division of Healthcare Policy and Research, <sup>3</sup>Division of Infectious Diseases, Department of Medicine; and <sup>4</sup>Division of Otolaryngology, Department of Surgery, University of Colorado Denver Anschutz Medical Campus, Aurora CO 80014.

### **Contents of Online Supplement**

**Supplement Table 1.** Univariable and Multivariable Analysis for Total SGRQ

**Supplement Table 2.** Demographics of the Never Smoker Cohort

**Supplement Figure 1.** Impact of Secondhand Tobacco Smoke (SHS) Exposure on General Quality of Life and Lung Function in the Total Cohort.

**Supplement Figure 2.** Impact of Secondhand Tobacco Smoke (SHS) Exposure on Respiratory Health in the Never Smoker Cohort.

**Supplement Figure 3.** Impact of Secondhand Tobacco Smoke (SHS) Exposure on General Quality of Life and Lung Function in the Never Smoker Cohort.

**Supplement Figure 4.** Synergistic Interaction Between Secondhand Tobacco Smoke (SHS) Exposure and Former Smoking in the Total Cohort.

**Supplement Figure 5.** Impact of Symptoms on Lung Function in the Secondhand Tobacco Smoke (SHS) Exposed, Preserved Lung Function Cohort.

**Supplement Figure 6.** Impact of Symptoms on Sinonasal Airway Inflammatory and Ciliated Cells in the Secondhand Tobacco Smoke (SHS) Exposed, Preserved Lung Function Cohort.

**Supplement Table 1. Univariable and Multivariable Analysis for Total SGRQ**

| <b>Quantile Regression (Median) for Total SGRQ</b> |             |                 |                |                                      |             |               |                |
|----------------------------------------------------|-------------|-----------------|----------------|--------------------------------------|-------------|---------------|----------------|
| <b>Univariable Analysis</b>                        |             |                 |                | <b>Multiple Regression Analysis</b>  |             |               |                |
| <b>Variable</b>                                    | <b>Beta</b> | <b>95% CI</b>   | <b>P-Value</b> | <b>Variable</b>                      | <b>Beta</b> | <b>95% CI</b> | <b>P-Value</b> |
| Airline Work                                       | 6.7         | 2.7, 10.7       | 0.001          | Airline Work                         | 6.5         | 3.7, 9.2      | <0.001         |
| SHS-<br>Exposure                                   |             |                 |                | SHS-<br>Exposure                     |             |               |                |
| Age                                                | 0.4         | 0.1, 0.7        | 0.003          | Age                                  |             |               | NS             |
| Female                                             | 1.2         | -4.1, 6.6       | 0.65           | Female                               |             |               | NS             |
| BMI                                                | 0.8         | 0.3, 1.3        | <0.001         | BMI                                  | 0.8         | 0.5, 1.1      | <0.001         |
| Parental                                           | 2.6         | -1.1, 6.4       | 0.17           | Parental                             | 2.7         | 0.3, 5.1      | 0.03           |
| Smoking<br>During<br>Pregnancy                     |             |                 |                | Smoking<br>During<br>Pregnancy       |             |               |                |
| Non-Airline<br>Work SHS-<br>Exposure               | 0.1         | -0.0009,<br>0.3 | 0.07           | Non-Airline<br>Work SHS-<br>Exposure |             |               | NS             |
| Workplace<br>VGDF-<br>Exposure                     | 0.04        | -0.1, 0.1       | 0.53           | Workplace<br>VGDF-<br>Exposure       |             |               | NS             |
| HTN                                                | 1.1         | -4.0, 6.2       | 0.67           | HTN                                  |             |               | NS             |

*Definition of abbreviations:* SGRQ = St. George's Respiratory Questionnaire, CI = confidence interval, SHS = secondhand cigarette smoke, BMI = body mass index, VGDF = (self-reported exposure to) vapors, gases, dusts or fumes, HTN = hypertension, NS = non-significant.

**Supplement Table 2. Demographics of the Never Smokers in the Total Cohort\***

| <b>Characteristics</b>                     | <b>SHS Exposed<br/>N=131</b> | <b>SHS Unexposed<br/>N=42</b> | <b>P-value<sup>†</sup></b> |
|--------------------------------------------|------------------------------|-------------------------------|----------------------------|
| Age, y                                     | 66.0 (7.2)                   | 63.0 (7.6)                    | 0.02                       |
| Gender, n (%) female                       | 118 (90.1)                   | 32 (76.2)                     | 0.02                       |
| Race/Ethnicity                             |                              |                               |                            |
| White, n (%)                               | 113 (95.8)                   | 38 (92.7)                     | 0.43                       |
| Black, n (%)                               | 0 (0)                        | 0 (0)                         |                            |
| Asian, n (%)                               | 2 (1.7)                      | 0 (0)                         |                            |
| Hispanic, n (%)                            | 2 (1.7)                      | 2 (4.9)                       |                            |
| Native Hawaiian or Pacific Islander, n (%) | 0 (0)                        | 0 (0)                         |                            |
| Multirace, n (%)                           | 1 (0.9)                      | 1 (2.4)                       |                            |
| BMI, units                                 | 25.2 (4.1)                   | 26.4 (4.5)                    | 0.11                       |
| Resting SpO <sub>2</sub> , %               | 95.7 (2.1)                   | 95.6 (1.9)                    | 0.74                       |
| <b>Flight Attendant History</b>            |                              |                               |                            |
| Age of Hire, y                             | 24.0 (4.7)                   | NA                            | NA                         |
| Total Flying Years, y                      | 29.1 (14.4)                  | NA                            | NA                         |
| Years Elapsed Since SHS-Exposure, y        | 27.4 (9.5)                   | NA                            | NA                         |
| <b>SHS and VGDF Exposure History</b>       |                              |                               |                            |
| Prenatal SHS Exposure                      |                              |                               | 0.31                       |
| Only Mother Smoked, n (%)                  | 6 (4.6)                      | 2 (4.8)                       |                            |
| Only Father Smoked, n (%)                  | 37 (28.2)                    | 14 (33.3)                     |                            |
| Both Parents Smoked, n (%)                 | 30 (22.9)                    | 14 (33.3)                     |                            |
| Neither Parent Smoked, n (%)               | 58 (44.3)                    | 12 (28.6)                     |                            |
| Parental Smoking During Pregnancy, n (%)   | 73 (55.7)                    | 30 (71.4)                     | 0.07                       |
| Home SHS Exposure, y                       | 13.2 (11.2)                  | 13.5 (8.9)                    | 0.88                       |
| Median [IQR]                               | 17 [0, 20]                   | 18 [0, 19]                    | 0.95                       |
| Airline Work SHS Exposure, y               | 15.3 (9.3)                   | NA                            | NA                         |
| Non-Airline Work SHS Exposure, y           | 4.5 (7.8)                    | 18.5 (16.8)                   | <0.001                     |
| Median [IQR]                               | 1 [0, 5]                     | 19.5 [0, 37]                  | <0.001                     |
| Workplace VGDF Exposure, y                 | 10.4 (15.7)                  | 3.3 (7.8)                     | <0.001                     |
| Median [IQR]                               | 0 [0, 26]                    | 0 [0, 0]                      | 0.03                       |
| <b>Comorbidities</b>                       |                              |                               |                            |
| HTN, n (%)                                 | 36 (27.5)                    | 11 (26.2)                     | 0.87                       |
| CHF, n (%)                                 | 0 (0)                        | 1 (2.4)                       | 0.24                       |
| CAD, n (%)                                 | 4 (3.1)                      | 1 (2.4)                       | >0.99                      |
| DM, n (%)                                  | 2 (1.5)                      | 4 (9.5)                       | 0.03                       |
| High Cholesterol, n (%)                    | 39 (29.8)                    | 9 (21.4)                      | 0.29                       |
| Chronic Bronchitis, n (%)                  | 6 (4.6)                      | 2 (4.8)                       | >0.99                      |
| Emphysema, n (%)                           | 1 (0.8)                      | 1 (2.4)                       | 0.43                       |
| Asthma, n (%)                              | 12 (9.2)                     | 6 (14.3)                      | 0.34                       |
| Sinus Problems, n (%)                      | 43 (32.8)                    | 10 (23.8)                     | 0.27                       |
| Ear Infections, n (%)                      | 13 (9.9)                     | 2 (4.8)                       | 0.53                       |
| Osteopenia/Osteoporosis, n (%)             | 24 (18.3)                    | 6 (14.3)                      | 0.55                       |
| Sleep Apnea, n (%)                         | 11 (8.4)                     | 5 (11.9)                      | 0.49                       |
| Depression, n (%)                          | 19 (14.5)                    | 9 (21.4)                      | 0.29                       |
| Anxiety, n (%)                             | 20 (15.3)                    | 9 (21.4)                      | 0.35                       |
| Thyroid Disease, n (%)                     | 25 (19.1)                    | 10 (23.8)                     | 0.51                       |
| Skin Cancer, n (%)                         | 15 (11.5)                    | 3 (7.1)                       | 0.57                       |

|                              |           |         |      |
|------------------------------|-----------|---------|------|
| Total Non-skin Cancer, n (%) | 20 (15.3) | 3 (7.1) | 0.29 |
|------------------------------|-----------|---------|------|

\*Data are presented as mean (SD) unless otherwise stated. Percentages may not total 100% due to rounding. There were no missing data, except 8% for race/ethnicity.

*Definition of abbreviations:* SHS = secondhand cigarette smoke, BMI = body mass index, IQR = interquartile range, SpO<sub>2</sub>% = peripheral blood oxygen saturation, VGDF = (self-reported exposure to) vapors, gases, dusts or fumes, HTN = hypertension, CHF = congestive heart failure and CAD = coronary artery disease, DM = diabetes mellitus

<sup>†</sup>T-tests (or Mann-Whitney tests) were used for continuous variables and chi-square tests (or Fisher's exact tests) were used for categorical variables.

# Supplement Figure 1

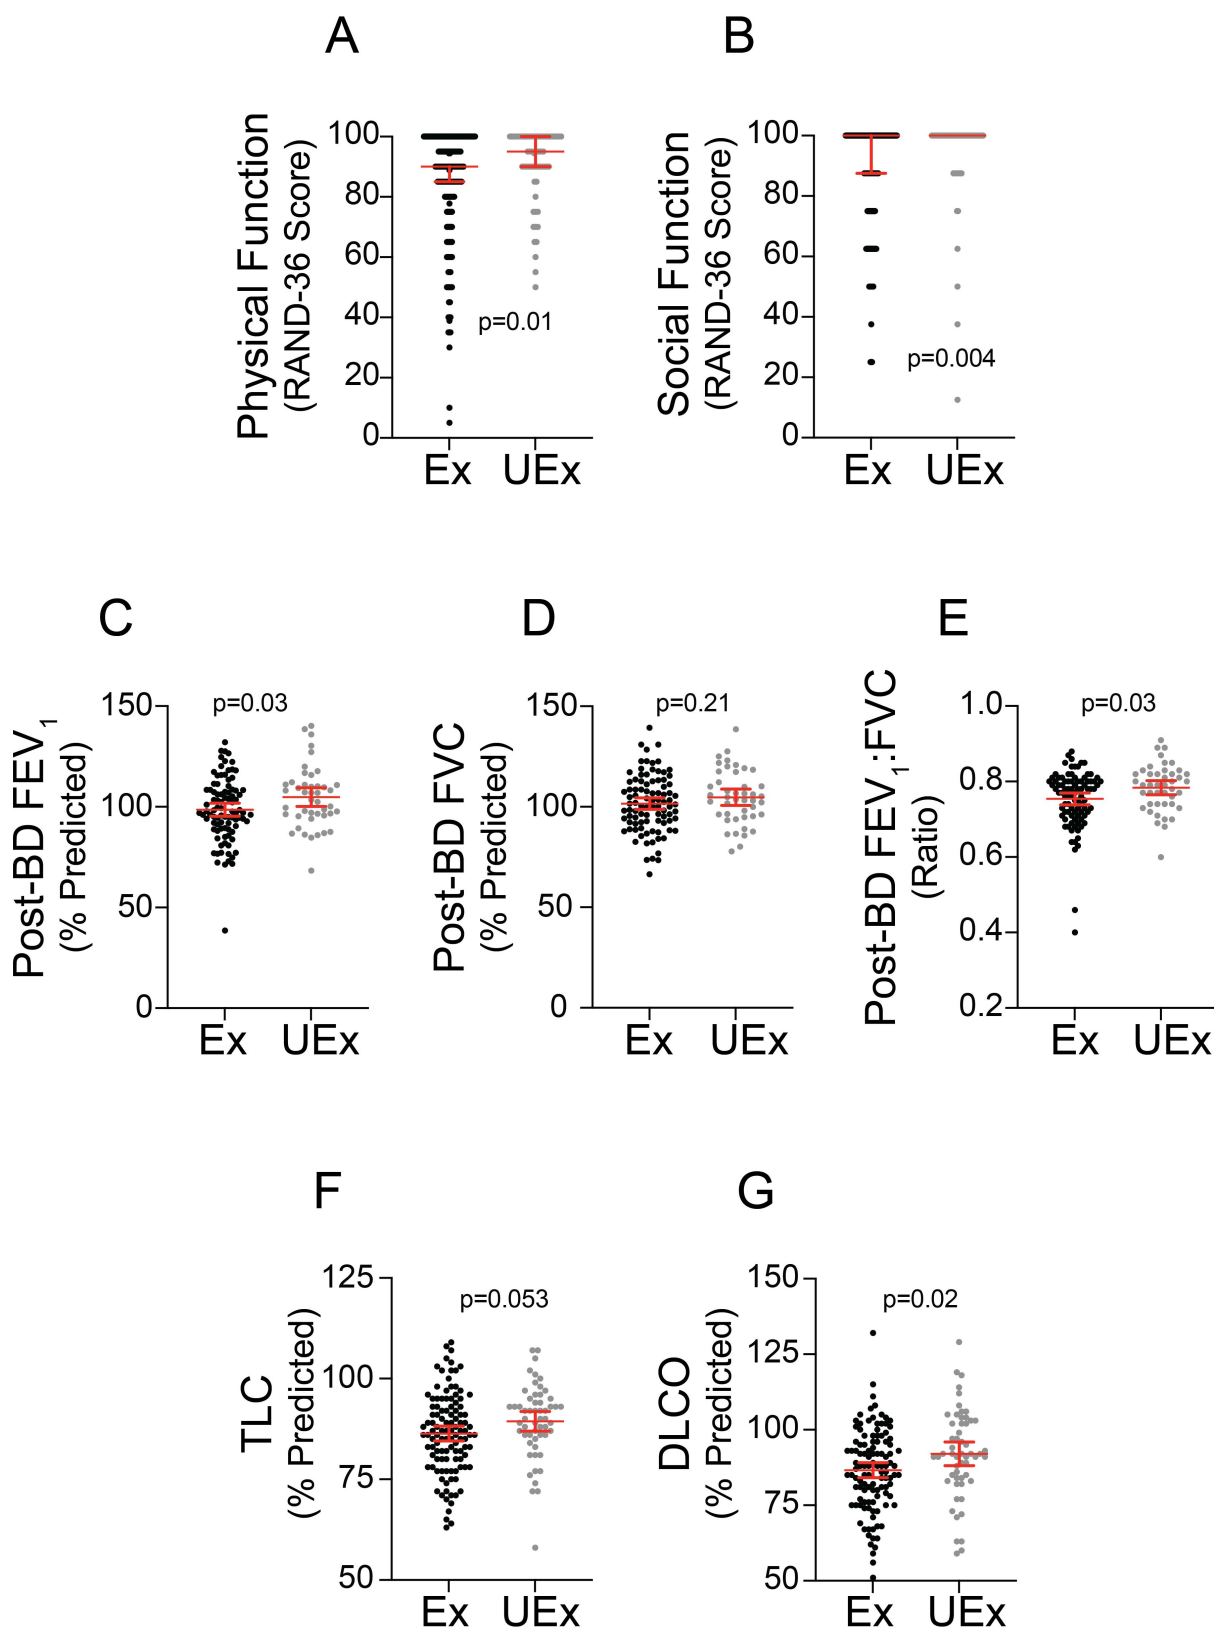

Supplement Figure 2

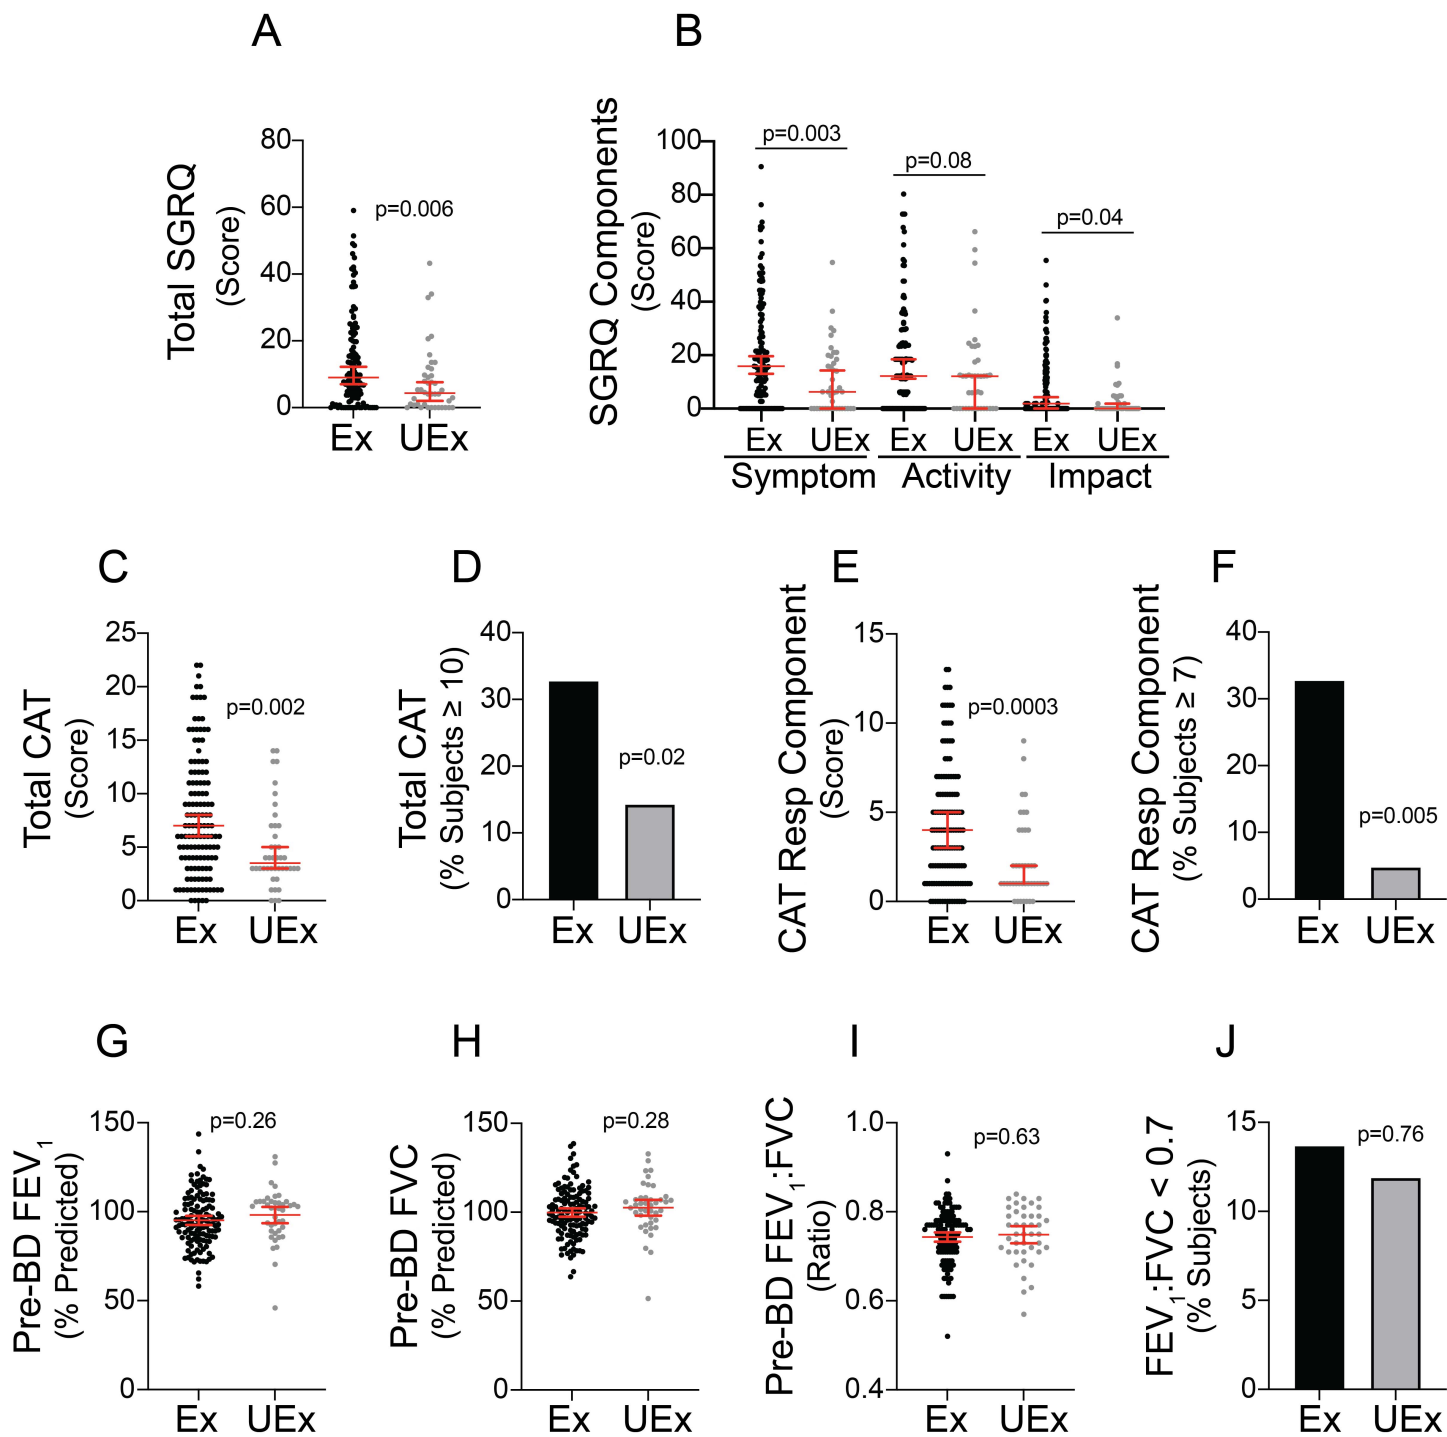

# Supplement Figure 3

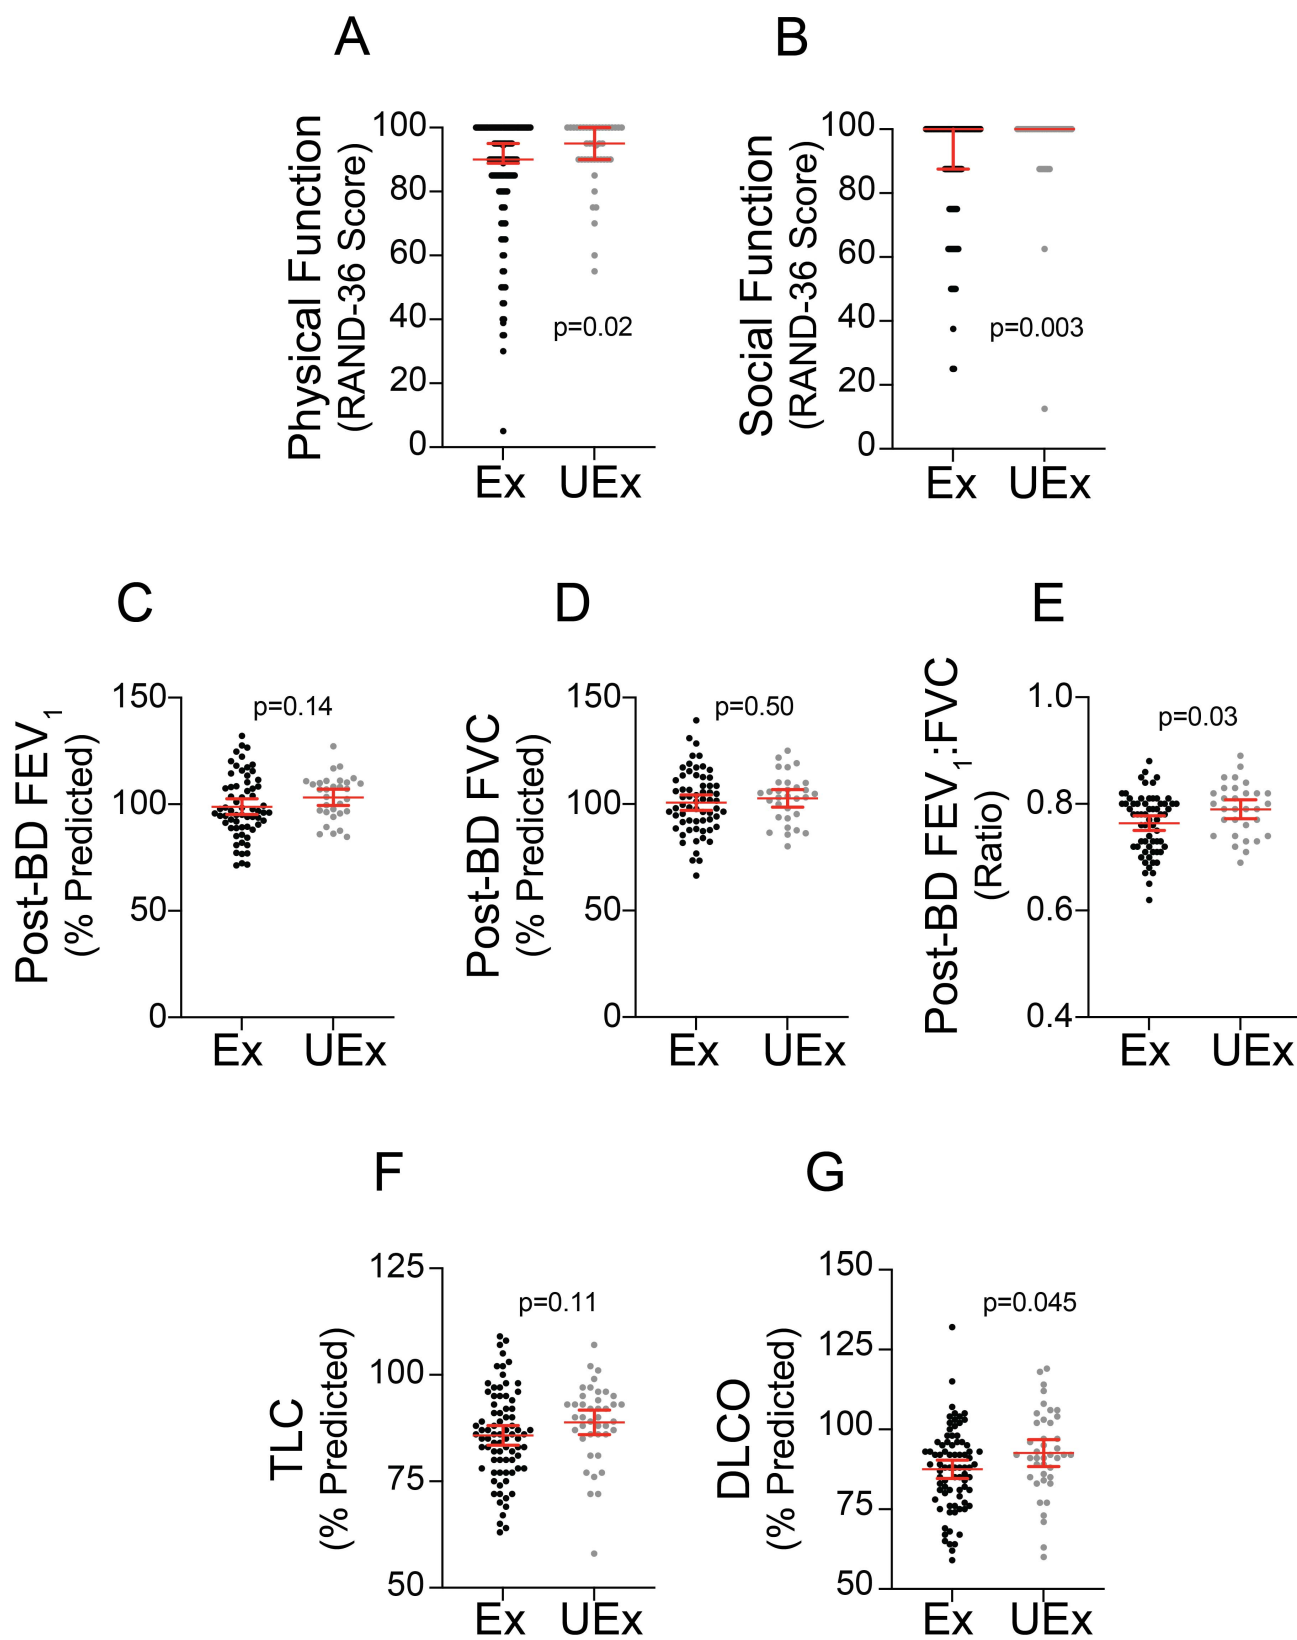

# Supplement Figure 4

A

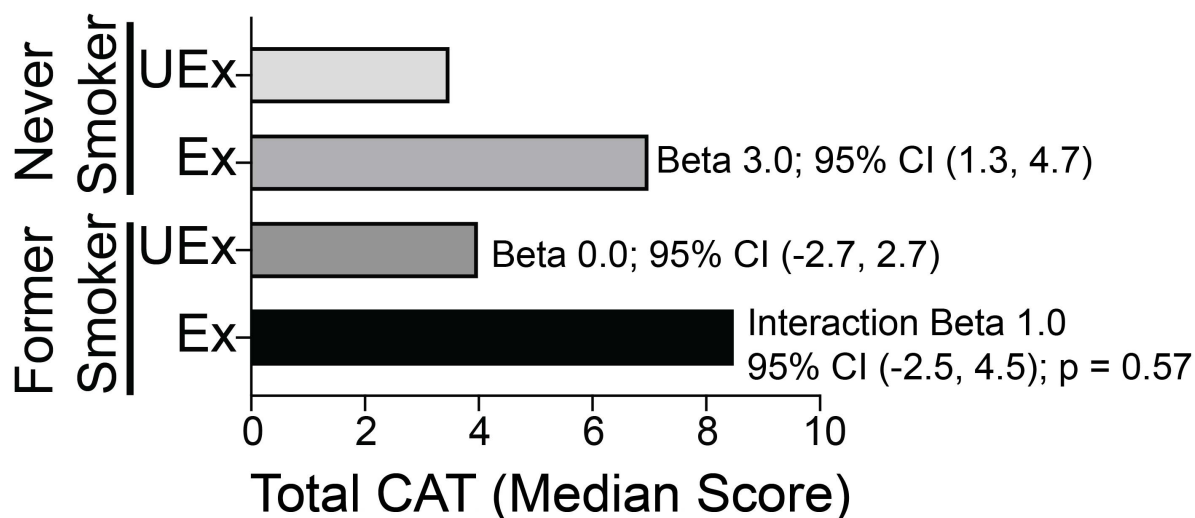

B

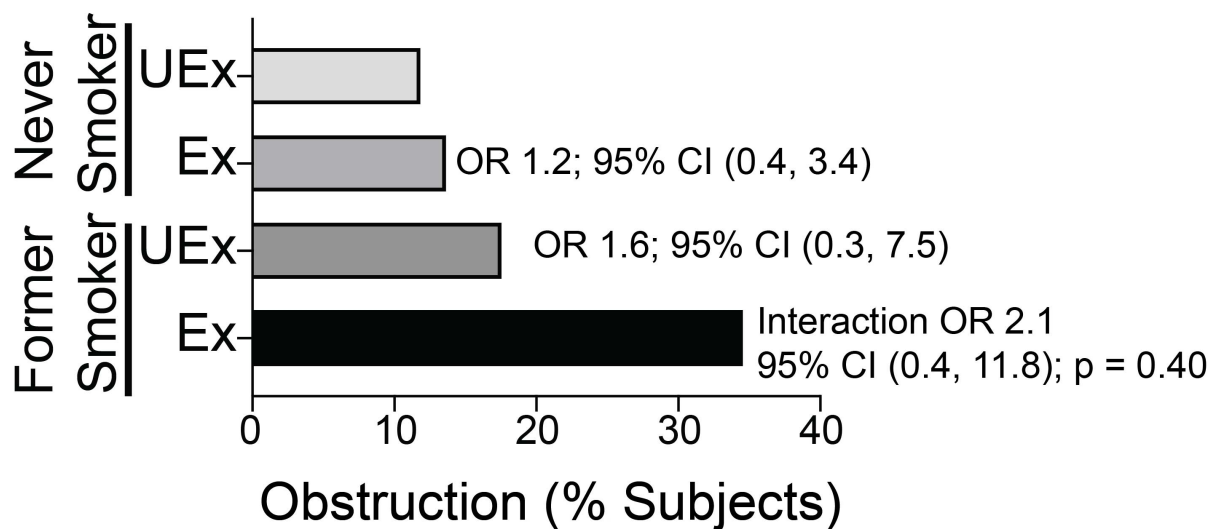



## Supplement Figure 5

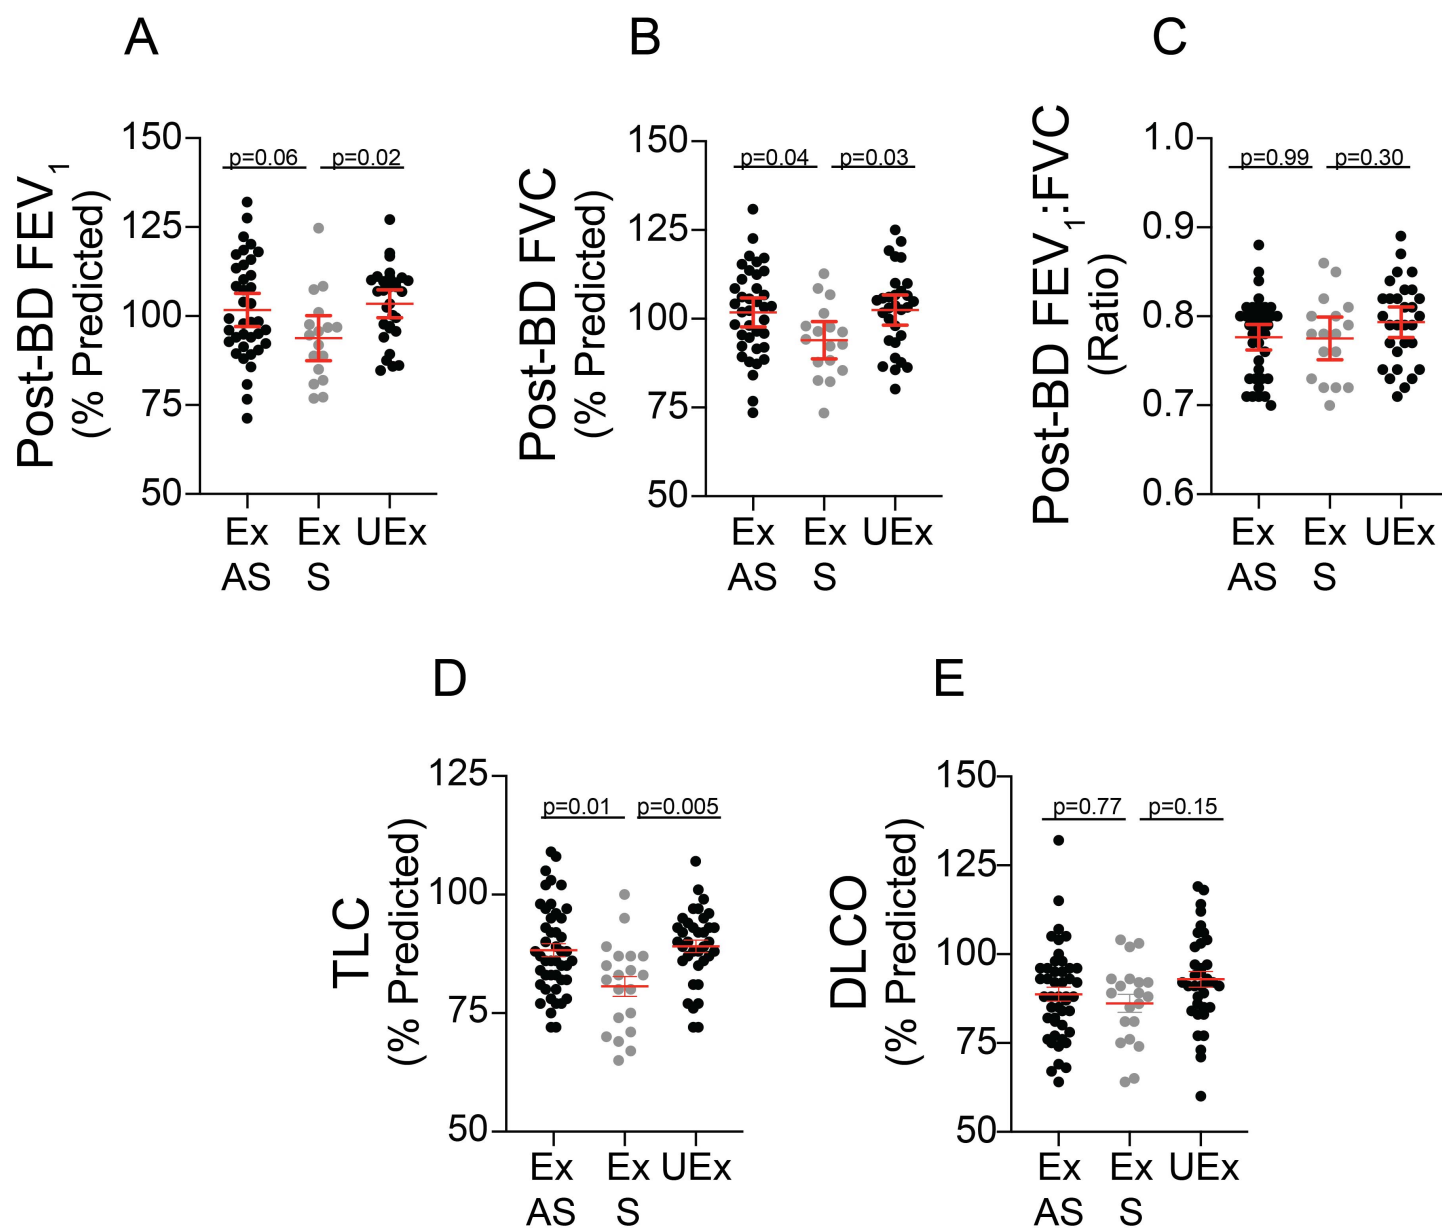

## Supplement Figure 6

## A Nasal Brushing

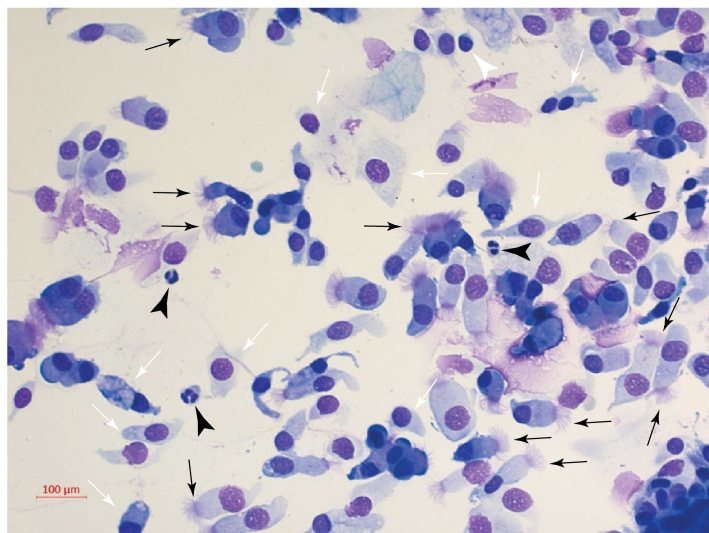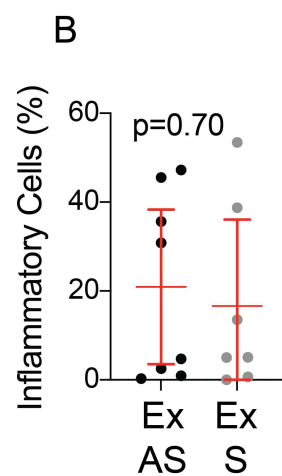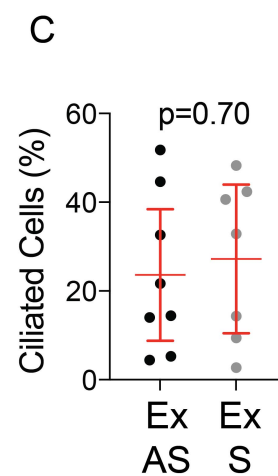

## FIGURE LEGENDS

**Supplement Figure 1. Impact of Secondhand Tobacco Smoke (SHS) Exposure on General Quality of Life and Lung Function in the Total Cohort.** The study examined differences in SHS-exposed (Ex; N=183) *versus* unexposed (UEx; N=59) subjects for the A) physical function and B) social function components of the RAND Corporation modification of the short form (SF)-36 questionnaire (RAND-36), post-bronchodilator (post-BD) C) FEV<sub>1</sub>, D) FVC, and E) FEV<sub>1</sub>:FVC ratio, F) total lung capacity (TLC), and G) lung diffusion of carbon monoxide (DLCO). P-values indicate results of a Mann-Whitney test for A-B, and data are shown as median and 95% CI. P-values indicate results of a t-test for C-G, and data are shown as mean and 95% CI.

**Supplement Figure 2. Impact of Secondhand Tobacco Smoke (SHS) Exposure on Respiratory Health in the Never Smoker Cohort.** The study examined differences in SHS-exposed (Ex; N=131) *versus* unexposed (UEx; N=42) never smokers for A) total St. George's Respiratory Questionnaire (SGRQ), B) symptom, activity and impact components of the SGRQ, C) total COPD Assessment Test (CAT), D) CAT  $\geq 10$ , E) CAT Respiratory (Resp) Component, F) CAT Resp Component  $\geq 7$ , pre-bronchodilator (pre-BD) G) FEV<sub>1</sub>, H) FVC, and I) FEV<sub>1</sub>:FVC ratio, and J) obstruction defined by an FEV<sub>1</sub>:FVC ratio  $< 0.7$  using post-BD measurements where available. P-values indicate results of a Mann-Whitney test for A-C and E, and data are shown as median and 95% CI. P-values indicate results of a t-test for G-I, and data are shown as mean and 95% CI. P-values indicate results of a Fisher's exact test for D, F and J.

**Supplement Figure 3. Impact of Secondhand Tobacco Smoke (SHS) Exposure on General Quality of Life and Lung Function in the Never Smoker Cohort.** The study examined differences in SHS-exposed (Ex; N=131) *versus* unexposed (UEx; N=42) never-smokers for the A) physical function and B) social function components of the RAND Corporation modification of the short form (SF)-36 questionnaire (RAND-36), post-bronchodilator (post-BD) C) FEV<sub>1</sub>, D) FVC, and E) FEV<sub>1</sub>:FVC ratio, and F) total lung capacity (TLC), and G) lung diffusion of carbon monoxide (DLCO). P-values

indicate results of a Mann-Whitney test for A-B, and data are shown as median and 95% CI. P-values indicate results of a t-test for C-G, and data are shown as mean and 95% CI.

**Supplement Figure 4. Synergistic Interaction Between Secondhand Tobacco Smoke (SHS)**

**Exposure and Former Smoking in the Total Cohort.** The study examined whether SHS-exposure (Ex) and former smoking interacted in a synergistic way compared to unexposed (UEx) never smokers for A) total COPD Assessment Test (CAT) and B) obstruction defined by an FEV<sub>1</sub>:FVC ratio < 0.7 using post-bronchodilator measurements where available. Beta or Odds Ratio (OR) and 95% CI indicate the main and interaction effects of Ex and former smoking using quantile regression for A, and logistic regression for B.

**Supplement Figure 5. Impact of Symptoms on Lung Function in the Secondhand Tobacco**

**Smoke (SHS) Exposed, Preserved Lung Function Cohort.** The study examined the impact of symptoms in secondhand tobacco smoke (SHS) exposed (Ex), never-smokers with preserved lung function. Symptomatic (S; CAT ≥ 10) SHS-subjects with preserved lung function (N=36) were compared to asymptomatic (AS; CAT < 10) SHS-exposed subjects (N=74) and to unexposed (UEx) never-smokers with preserved lung function (N=36) for post-bronchodilator (post-BD) A) FEV<sub>1</sub>, B) FVC, and C) FEV<sub>1</sub>:FVC ratio, D) total lung capacity (TLC), and E) lung diffusion of carbon monoxide (DLCO). Differences were assessed using a one-way ANOVA for A-E, which resulted in a p < 0.05 for A, B and D. P-values indicate results of a Dunnett's test and data are shown as mean and 95% CI.

**Supplement Figure 6. Impact of Symptoms on Sinonasal Airway Inflammatory and Ciliated Cells in the Secondhand Tobacco Smoke (SHS) Exposed, Preserved Lung Function Cohort.**

Panel A shows a representative Diff-Quick-stained cytospin of a nasal brushing demonstrating the presence of ciliated (black arrows) and non-ciliated (white arrows) epithelial cells, neutrophils (black arrowheads) and lymphocytes (white arrowheads). Panels B and C show differences in B) inflammatory cells (neutrophils and lymphocytes) and C) ciliated cells in symptomatic (S; CAT ≥ 10) and asymptomatic (AS; CAT < 10) secondhand tobacco smoke exposed (Ex), never-smokers with

preserved lung function. P-values indicate results of t-tests for panels B and C, where data are shown as mean and 95% CI.
